# Supplementary material
Source: publisher figshare collection journal article supplement (https://karger.figshare.com/ndownloader/files/23234759)
Supplement: Supplementary file 1 [file 23234759]

### Table S1:

MRI sequence parameters for Dixon acquisitions. MRI: magnetic resonance imaging, PDFF: proton density fat fraction, TR: repetition time, TE: echo time, SENSE: sensitivity encoding for accelerated MRI.

|  | **Six-echo Dixon for supraclavicular PDFF** | **Six-echo Dixon for gluteal PDFF** |
| --- | --- | --- |
| TR | 12 ms | 8.2 ms |
| TE1/ΔTE | TE1 = 1.24 msec/ ΔTE = 1.0 ms | TE1 = 1.24 msec/ ΔTE = 1.0 ms |
| Flip angle | 5° | 5° |
| Bandwidth | 1413 Hz/pixel | 1413 Hz/pixel |
| Acquisition matrix size | 268 x 200 | 268 x 200 |
| Field of view (FOV) | 400 x 300 x 140 mm³ | 400 x 300 x 140 mm³ |
| Acquisition voxel size | 1.5 x 1.5 x 1.5 mm³ | 1.5 x 1.5 x 1.5 mm³ |
| Slices | 93 | 93 |
| SENSE reduction factor | 2.5 x 1.0 | 2.5 x 1.0 |
| Number of averages | 3 | 2 |
| Scan time | 4 min 14 s | 2 min 1 s |
